# Supplementary material
Source: Elsevier journal article supplement (https://www.sciencedirect.com/science/article/pii/S0300289620302209)

**Figura suplementaria 1: NEUMONÍA BILATERAL POR COVID-19.** Mujer de 47 años. Antecedentes personales: hipertensión arterial y Talasemia menor. Acude al servicio de Urgencias por malestar general, astenia, cefalea, náusea y leve disnea de tres días de evolución. No fiebre. Hemograma : Sin linfopenia. Hemoglobina de 10.3 g/dL. Lactato deshidrogenasa 231 U/L (120-300) y D-dímeros 318 ng/mL (0-500). PCR positiva para SARS-CoV-2. **A-** RX pósterio - anterior de tórax insuficientemente inspirada por disnea. Tenues opacidades pulmonares de morfología redondeada, en base pulmonar derecha (flechas) y de menor tamaño en lóbulo superior izquierdo (flecha). **B-** RX de tórax proyección lateral sin hallazgos valorables. **C-** TDT: imagen nº 26 (central). Se aprecian dos opacidades pulmonares en base derecha (flechas), una de localización periférica bajo la cisura menor, y la segunda de localización infra hiliar. **D-** TDT: imagen nº 32 (posterior). Múltiples opacidades pulmonares de distribución parcheada y predominio posterior en ambos hemitórax (flechas).

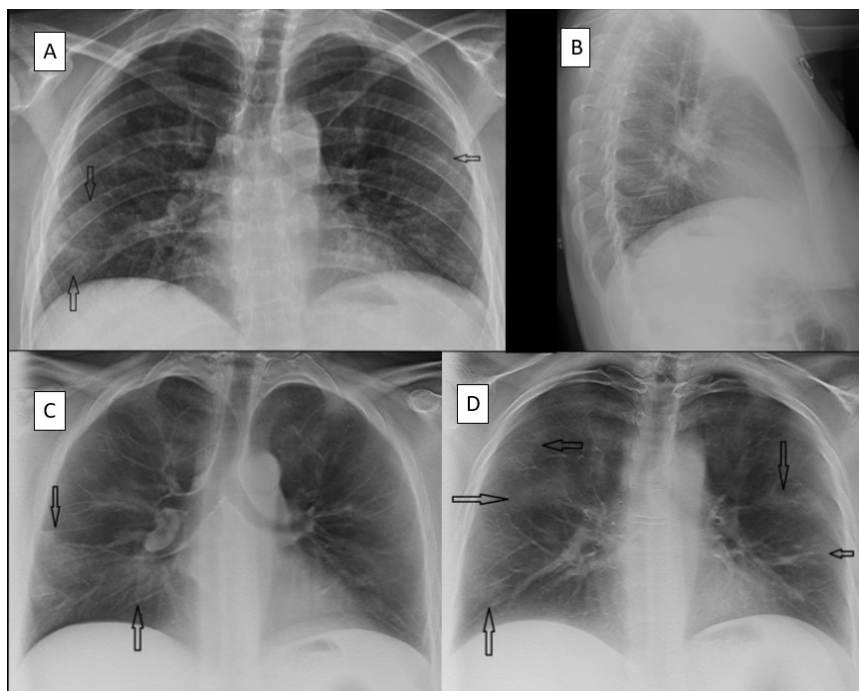

**Figura suplementaria 2:** NEUMONÍA BILATERAL POR COVID-19. Mujer de 57 años que acude al hospital con malestar general y cefalea. Sin síntomas respiratorios al ingreso. Pruebas de laboratorio: Hemograma sin linfopenia, Lactato Deshidrogenasa 544U/L (120-300) y D-dímeros de 1759 ng/mL (0-500). PCR positiva para SARS-CoV-2. **A-** RX póstero – anterior de tórax: opacidad de morfología triangular en base pulmonar izquierda (flecha). **B-** TDT: imagen nº 19 (central). Pequeña opacidad pulmonar en lóbulo superior izquierdo (flecha). **C-** TDT: imagen nº 32 (posterior). Opacidades pulmonares múltiples de distribución parcheada en la periferia del hemitórax derecho, campos medio e inferior (flechas).

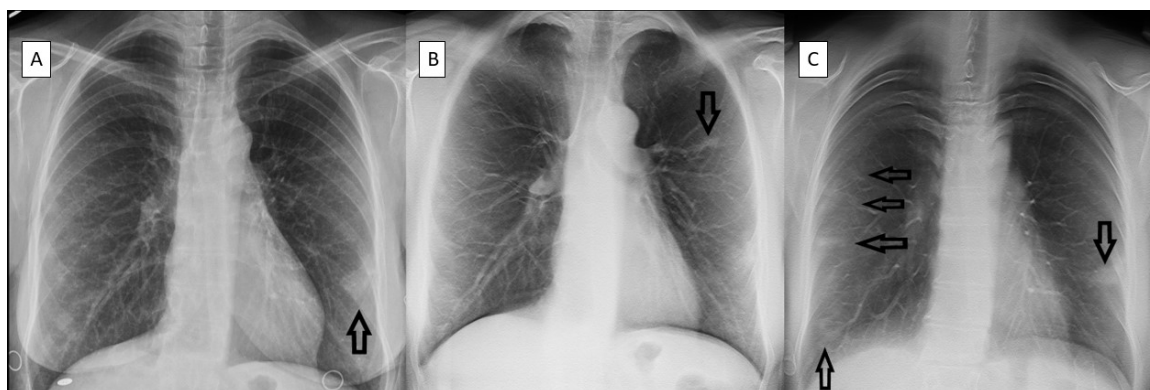

Supplement: mmc1 [file S0300289620302209:mmc1.pdf]
